# Supplementary material for: Photo-active integrated getters for stable dye-sensitized solar cells
Source: Royal Society of Chemistry journal article supplement (doi:10.1039/c2ra23218a), 2012-12-11
Supplement: c2ra23218a.pdf [file c2ra23218a.pdf]

## SUPPLEMENTARY INFORMATION

### Photo-active Getter for Stable Dye-Sensitized Solar Cells

**Simone Guarnera,<sup>a,c</sup> Antonio Bonucci<sup>\*b</sup>, Stefano Perissinotto<sup>a</sup>, Roberto Giannantonio<sup>b</sup>, Guglielmo Lanzani<sup>a</sup> and Annamaria Petrozza<sup>\*a</sup>**

a Center for Nano Science and Technology @Polimi, Istituto Italiano di Tecnologia, Via Pascoli 70/3, 20133 Milano, Italy

b SAES Getters S.p.A., Viale Italia 77, 20020 Lainate (Milan) – Italy

c Dipartimento di Fisica, Politecnico di Milano, Piazza L. da Vinci 32, 20133 Milano Italy.

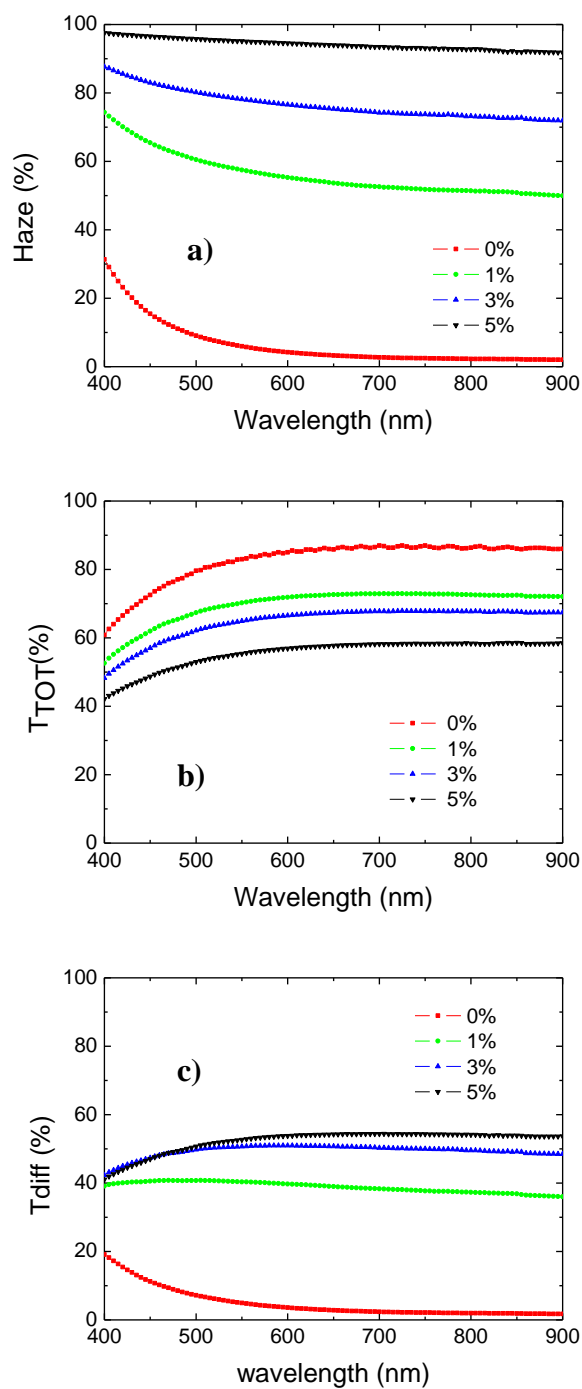

**Figure S1:** **a)** The photoanodes haze calculated varying the nanozelites concentration. **b)** Total and **c)** diffusive transmittance spectra measured by using an integrating sphere (see methos). These spectra were used to calculate the photoanode haze.

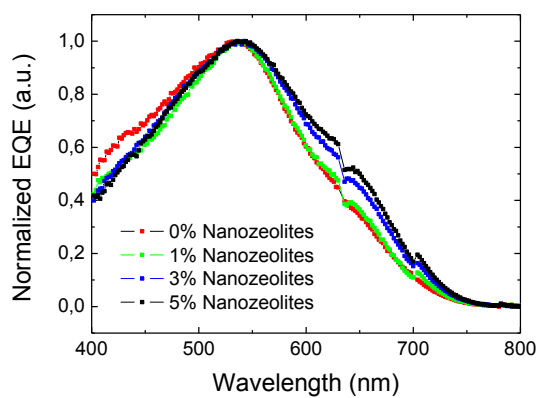

**Figure S2:** Normalized external quantum efficiency of DSSC devices with photoanodes containing different concentrations of nanozeolites.

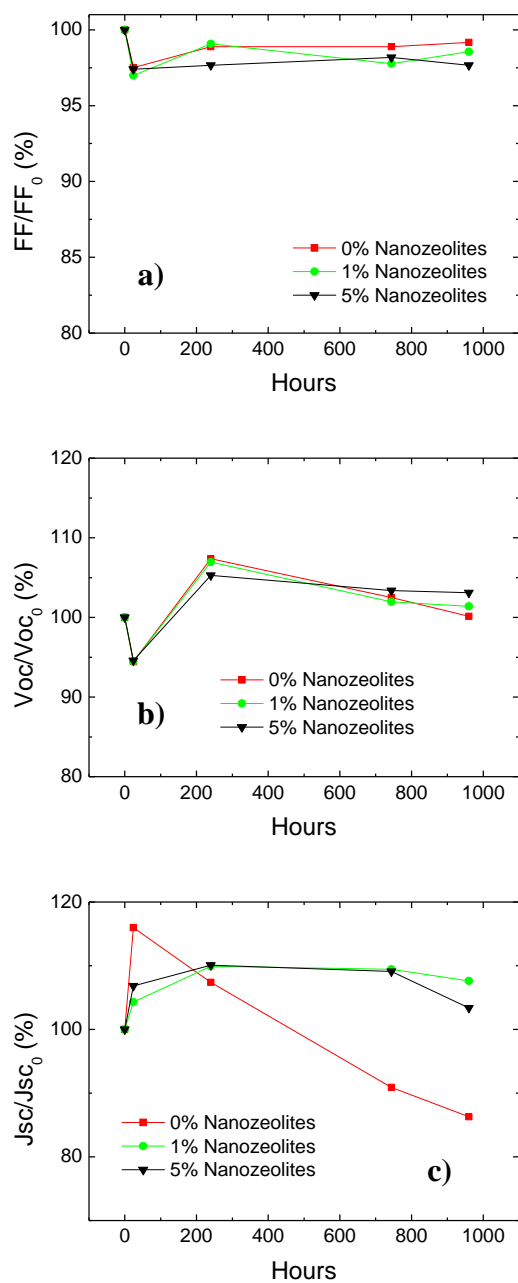

**Figure S3:** Figures of merits of the solar cells monitored for 1000 hours under outdoor exposure.
